# Supplementary material for: Experimental and DFT study of the effect of mercaptosuccinic acid on cyanide-free immersion gold deposition
Source: Royal Society of Chemistry journal article supplement (doi:10.1039/d0ra00925c), 2020-01-01
Supplement: d0ra00925c1.pdf [file d0ra00925c1.pdf]

## Supplementary Information

### Experimental and DFT study of the effect of mercaptosuccinic acid on cyanide-free immersion gold deposition

Bo Wu,<sup>a</sup> Jingmeng Huang,<sup>a</sup> Zeman Lv,<sup>a</sup> Ziya Cui,<sup>a</sup> Guanghui Hu,<sup>a</sup> Jiye Luo,<sup>a</sup> Mohamed S. Selim<sup>a, b</sup> and Zhifeng Hao<sup>\*a</sup>

<sup>a</sup> School of Chemical Engineering and Light Industry, Guangdong University of Technology, Guangzhou 510006, P. R. China.

<sup>b</sup> Petroleum Application Department, Egyptian Petroleum Research Institute, Nasr City 11727, Cairo, Egypt.

\* Correspondence to:

[haozf@gdut.edu.cn](mailto:haozf@gdut.edu.cn) (Zhifeng Hao)

# Figures

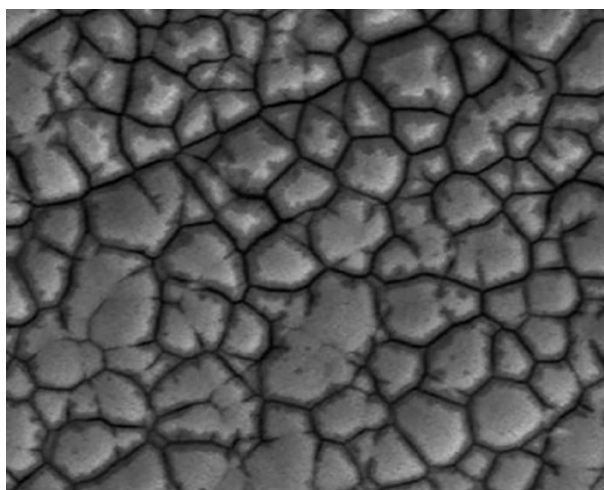

**Fig. S1** Nickel deposit showing black pad ( $5K\times$ )<sup>1</sup>.

The black pad phenomenon is characterized by an uneven nickel layer and fissures or crevices between nodules, as shown in Fig. S1.

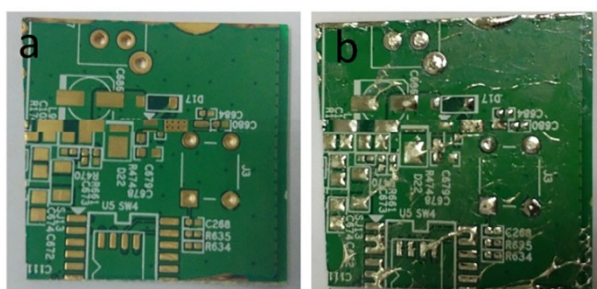

**Fig. S2** Solderability test of printed circuit board: (a) before test and (b) after test.

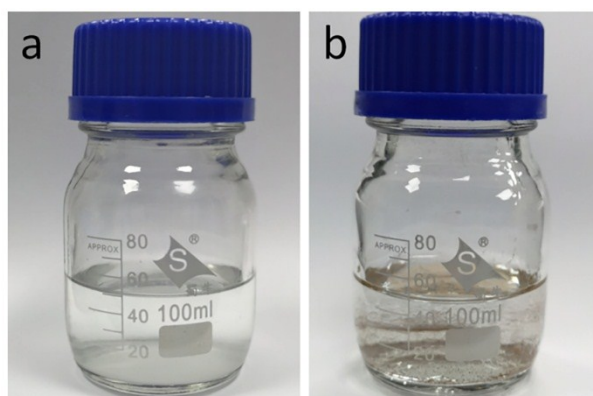

**Fig. S3** Appearances of plating solutions after placing at room temperature for 200 days: (a) MSA as complexant and (b) DMH as complexant.

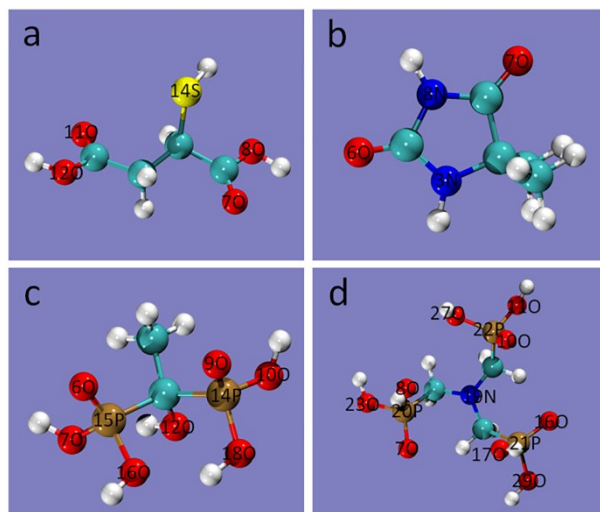

**Fig. S4** Optimized molecular structure of different complexing agents with atom symbols: (a) MSA, (b) DMH, (c) HEDP, and (d) ATMP.

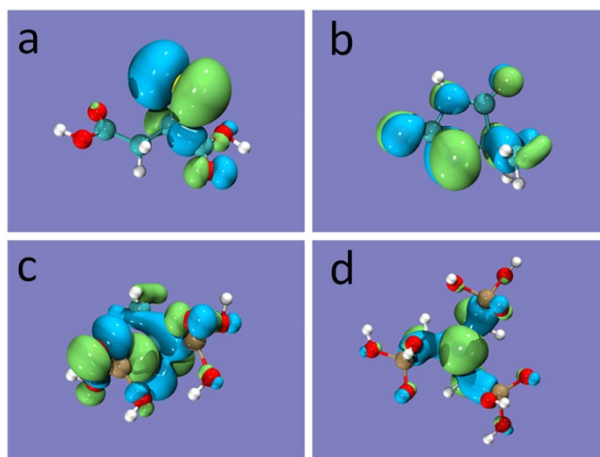

**Fig. S5** Localization of HOMO (isovalues are 0.03 and -0.03 a.u.) of (a) MSA, (b) DMH, (c) HEDP, and (d) ATMP.

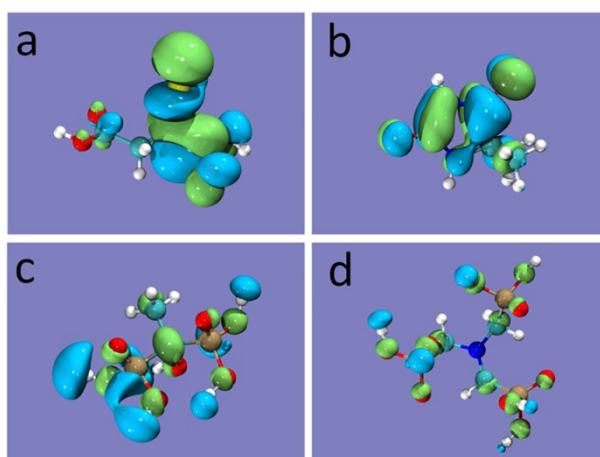

**Fig. S6** Localization of LUMO (isovalues are 0.03 and -0.03 a.u.) of (a) MSA, (b) DMH, (c) HEDP, and (d) ATMP.

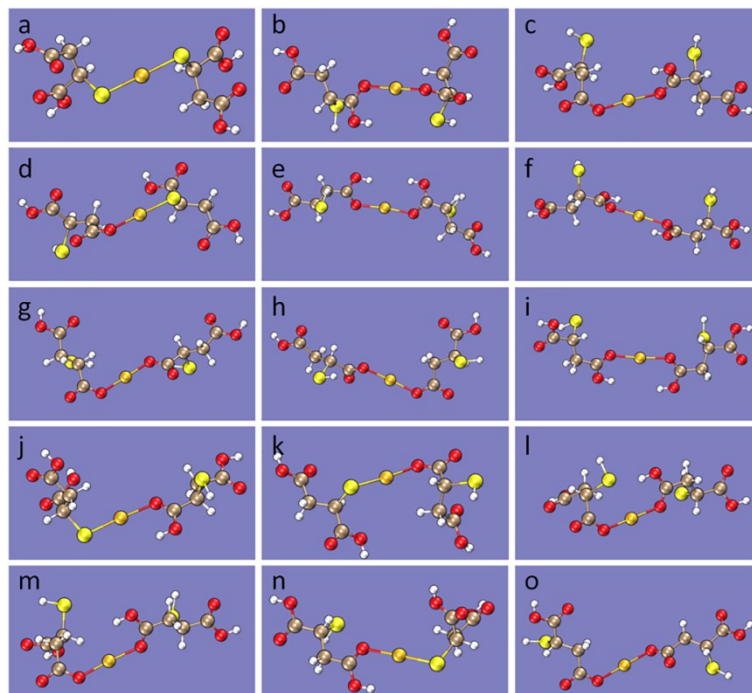

**Fig. S7** Optimized structures of the gold(I) complexes with MSA: (a) S-Au-S, (b) 7O-Au-8O, (c) 7O-Au-12O, (d) 12O-Au-S, (e) 7O-Au-7O, (f) 7O-Au-11O, (g) 8O-Au-8O, (h) 8O-Au-12O, (i) 11O-Au-11O, (j) 7O-Au-S, (k) 8O-Au-S, (l) 11O-Au-8O, (m) 11O-Au-12O, (n) 11O-Au-S and (o) 12O-Au-12O.

## Tables

**Table S1** Au<sup>+</sup> and Ni<sup>2+</sup> concentrations of plating bath before and after gold plating

| Solution   | [Au <sup>+</sup> ] <sub>0</sub> / mM | [Ni <sup>2+</sup> ] <sub>0</sub> / mM | [Au <sup>+</sup> ] <sub>1</sub> / mM | [Ni <sup>2+</sup> ] <sub>1</sub> / M | Δ[Au <sup>+</sup> ]/ M | Δ[Ni <sup>2+</sup> ]/ M |
|------------|--------------------------------------|---------------------------------------|--------------------------------------|--------------------------------------|------------------------|-------------------------|
| 1          | 7.101                                | 0                                     | 7.059                                | 7.017×10 <sup>-5</sup>               | 4.213×10 <sup>-5</sup> | 7.017×10 <sup>-5</sup>  |
| 2          | 7.102                                | 0                                     | 7.059                                | 7.230×10 <sup>-5</sup>               | 4.297×10 <sup>-5</sup> | 7.230×10 <sup>-5</sup>  |
| Mean value | 7.102                                | 0                                     | 7.059                                | 7.123×10 <sup>-5</sup>               | 4.256×10 <sup>-5</sup> | 7.123×10 <sup>-5</sup>  |

In Table S1, the subscript “0” represents the ion concentration before the reaction, and the subscript “1” represents the ion concentration after the reaction. Numbers “1” and “2” represent two baths with the same formula. Before gold plating, the nickel coating has been rinsed, so the Ni<sup>2+</sup> in the gold plating solution can only be dissolved from the coating into the solution through a replacement reaction. The Au<sup>+</sup> consumed by immersion gold is twice as much as Ni<sup>2+</sup> generated, so based on the data above, it can be calculated that the ratio of immersion gold is 83.68%.

**Table S2** Composition of the main atoms for HOMO and condensed local softness of MSA, DMH, HEDP, and ATMP

| Molecule | Atom  | Composition of each atom | Condensed local softness/ Hartree-e |
|----------|-------|--------------------------|-------------------------------------|
| MSA      | 7(O)  | 6.6%                     | 0.366                               |
|          | 8(O)  | 1.3%                     | 0.128                               |
|          | 11(O) | 0.2%                     | 0.193                               |
|          | 12(O) | 0.03%                    | 0.108                               |
|          | 14(S) | 85.7%                    | 1.155                               |
| DMH      | 3(N)  | 57.0%                    | 0.570                               |
|          | 6(O)  | 16.7%                    | 0.442                               |
|          | 7(O)  | 4.3%                     | 0.279                               |
|          | 8(N)  | 4.9%                     | 0.127                               |
| HEDP     | 6(O)  | 24.4%                    | 0.410                               |
|          | 7(O)  | 2.7%                     | 0.119                               |
|          | 9(O)  | 6.3%                     | 0.463                               |
|          | 10(O) | 0.8%                     | 0.124                               |

|      |       |       |       |
|------|-------|-------|-------|
|      | 12(O) | 33.7% | 0.309 |
|      | 14(P) | 3.3%  | 0.190 |
|      | 15(P) | 10.3% | 0.177 |
|      | 16(O) | 1.0%  | 0.064 |
|      | 18(O) | 0.4%  | 0.125 |
| ATMP | 7(O)  | 1.2%  | 0.135 |
|      | 8(O)  | 0.9%  | 0.029 |
|      | 10(O) | 1.0%  | 0.187 |
|      | 11(O) | 1.8%  | 0.070 |
|      | 16(O) | 1.0%  | 0.158 |
|      | 17(O) | 1.0%  | 0.038 |
|      | 19(N) | 45.4% | 0.619 |
|      | 20(P) | 6.0%  | 0.072 |
|      | 21(P) | 5.3%  | 0.082 |
|      | 22(P) | 8.0%  | 0.096 |
|      | 23(O) | 2.5%  | 0.096 |
|      | 25(O) | 1.8%  | 0.101 |
|      | 27(O) | 0.4%  | 0.055 |

**Table S3** Minima of ALIE of MSA, DMH, HEDP, and ATMP

| Molecule | Number | ALIE/ a.u. | Number | ALIE/ a.u. |
|----------|--------|------------|--------|------------|
| MSA      | 1      | 0.371      | 6      | 0.444      |
|          | 2      | 0.419      | 7      | 0.392      |
|          | 3      | 0.419      | 8      | 0.421      |
|          | 4      | 0.293      | 9      | 0.292      |
|          | 5      | 0.393      | 10     | 0.372      |
| DMH      | 1      | 0.357      | 7      | 0.356      |
|          | 2      | 0.353      | 8      | 0.422      |
|          | 3      | 0.395      | 9      | 0.422      |
|          | 4      | 0.395      | 10     | 0.424      |
|          | 5      | 0.368      | 11     | 0.424      |
|          | 6      | 0.367      | 12     | 0.367      |
| HEDP     | 1      | 0.418      | 9      | 0.374      |
|          | 2      | 0.372      | 10     | 0.376      |
|          | 3      | 0.377      | 11     | 0.410      |
|          | 4      | 0.428      | 12     | 0.436      |
|          | 5      | 0.437      | 13     | 0.373      |
|          | 6      | 0.425      | 14     | 0.406      |
|          | 7      | 0.385      | 15     | 0.364      |
|          | 8      | 0.372      | 16     | 0.411      |
| ATMP     | 1      | 0.403      | 11     | 0.414      |
|          | 2      | 0.358      | 12     | 0.411      |
|          | 3      | 0.404      | 13     | 0.362      |
|          | 4      | 0.414      | 14     | 0.404      |
|          | 5      | 0.360      | 15     | 0.365      |
|          | 6      | 0.412      | 16     | 0.361      |
|          | 7      | 0.409      | 17     | 0.402      |
|          | 8      | 0.312      | 18     | 0.406      |
|          | 9      | 0.414      | 19     | 0.360      |
|          | 10     | 0.407      | 20     | 0.358      |

## Reference

1. G. Milad, *Circuit World*, 2010, **36**, 10-13.
